# The Lid Domain of *Caenorhabditis elegans* Hsc70 Influences ATP Turnover, Cofactor Binding and Protein Folding Activity

Li Sun<sup>1,2</sup>, Franziska T. Edelmann<sup>1</sup>, Christoph J. O. Kaiser<sup>1</sup>, Katharina Papsdorf, Andreas M. Gaiser, Klaus Richter\*

Center for Integrated Protein Science Munich (CIPS<sup>M</sup>) and Department Chemie, Technische Universität München, Garching, Germany

## Abstract

Hsc70 is a conserved ATP-dependent molecular chaperone, which utilizes the energy of ATP hydrolysis to alter the folding state of its client proteins. In contrast to the Hsc70 systems of bacteria, yeast and humans, the Hsc70 system of *C. elegans* (CeHsc70) has not been studied to date. We find that CeHsc70 is characterized by a high ATP turnover rate and limited by post-hydrolysis nucleotide exchange. This rate-limiting step is defined by the helical lid domain at the C-terminus. A certain truncation in this domain (CeHsc70-Δ545) reduces the turnover rate and renders the hydrolysis step rate-limiting. The helical lid domain also affects cofactor affinities as the lidless mutant CeHsc70-Δ512 binds more strongly to DNJ-13, forming large protein complexes in the presence of ATP. Despite preserving the ability to hydrolyze ATP and interact with its cofactors DNJ-13 and BAG-1, the truncation of the helical lid domain leads to the loss of all protein folding activity, highlighting the requirement of this domain for the functionality of the nematode's Hsc70 protein.

**Citation:** Sun L, Edelmann FT, Kaiser CJO, Papsdorf K, Gaiser AM, et al. (2012) The Lid Domain of *Caenorhabditis elegans* Hsc70 Influences ATP Turnover, Cofactor Binding and Protein Folding Activity. PLoS ONE 7(3): e33980. doi:10.1371/journal.pone.0033980

**Editor:** Harm Kampinga, University Medical Center Groningen, University of Groningen, The Netherlands

**Received:** November 4, 2011; **Accepted:** February 20, 2012; **Published:** March 29, 2012

**Copyright:** © 2012 Sun et al. This is an open-access article distributed under the terms of the Creative Commons Attribution License, which permits unrestricted use, distribution, and reproduction in any medium, provided the original author and source are credited.

**Funding:** This study was funded by a grant of the Deutsche Forschungsgemeinschaft to KR (DFG-grant RI1873/1-1). The funders had no role in study design, data collection and analysis, decision to publish, or preparation of the manuscript.

**Competing Interests:** The authors have declared that no competing interests exist.

\* E-mail: klaus.richter@ch.tum.de

† These authors contributed equally to this work.

‡ Current address: Biozentrum, University of Basel, Basel, Switzerland

## Introduction

Hsc70 and its heat-shock inducible homolog Hsp70 are ATP-dependent molecular chaperones which bind unfolded proteins [1]. They participate in various cellular processes as diverse as protein *de novo* folding, protein translocation across organelle membranes and uncoating of clathrin-coated vesicles [2–8]. In eukaryotes, several cytosolic variants of Hsp70-like proteins with distinct features are encoded. Some, like the yeast proteins Ssb1, Ssb2 and Ssz1, reside at the ribosome as part of the ribosome-associated complex (RAC), while others, such as Hsc70s and the heat-inducible Hsp70s are assumed to be diffusible factors in the cytosol. Two Hsc70-homologs (Ssa1 and Ssa2) are expressed in budding yeast at normal growth conditions and two Hsp70s (Ssa3 and Ssa4) are expressed only in response to stress. The simultaneous knockout of *SSA1* and *SSA2* is lethal at elevated temperatures [9], but the general redundancy of Hsp70/Hsc70-proteins complicates analysis *in vivo*. While the mammalian system is even more complex [10], in *C. elegans* only one Hsc70-like protein, HSP-1, exists (termed CeHsc70 here) and its three Hsp70-proteins (HSP-70, F44E5.4, F44E5.5) are only expressed in response to heat-shock [11,12]. The RNAi-mediated knockdown of CeHsc70 has dramatic consequences, leading to increased protein aggregation [13] and arrested development at early larval stages [14,15], confirming that essential and non-redundant cellular functions are performed by this homolog of Hsc70.

Hsc70 chaperones generally are arranged in three domains: an N-terminal nucleotide binding domain (NBD), a substrate binding middle domain (SBD), and a C-terminal helical domain, which covers the substrate binding groove of the SBD [16,17]. While the helical lid domain diverges strongly between eukaryotic and prokaryotic species, the NBD and SBD are highly conserved. Biochemical studies of the bacterial Hsp70-protein DnaK described many aspects of the ATP-hydrolysis mechanism and defined a hydrolysis cycle, which is coupled to the substrate processing activity: An ATP-bound state of Hsp70 binds substrates weakly. After ATP hydrolysis, the substrate is efficiently bound by ADP-Hsp70. This complex is resolved slowly by the release of ADP and substrate (reviewed in [3,4]). All Hsp70 domains are supposedly participating in and communicating during this process [18–20]. While it was shown that the helical lid domain covers the substrate binding groove of the SBD [21] and is important for efficient protein folding [22] the mechanistic features of its involvement are not fully understood yet.

Two distinct types of cofactors influence the ATPase cycle in all species (reviewed in [23,24]). J-domain containing proteins, like mammalian Hsp40s or bacterial DnaJ, accelerate the hydrolysis reaction of Hsp70s [25]. Nucleotide exchange factors (NEFs), like bacterial GrpE or human Bag1, specifically facilitate the release of the nucleotide after hydrolysis [26–28]. The combined action of these proteins strongly accelerates ATP turnover of Hsp70

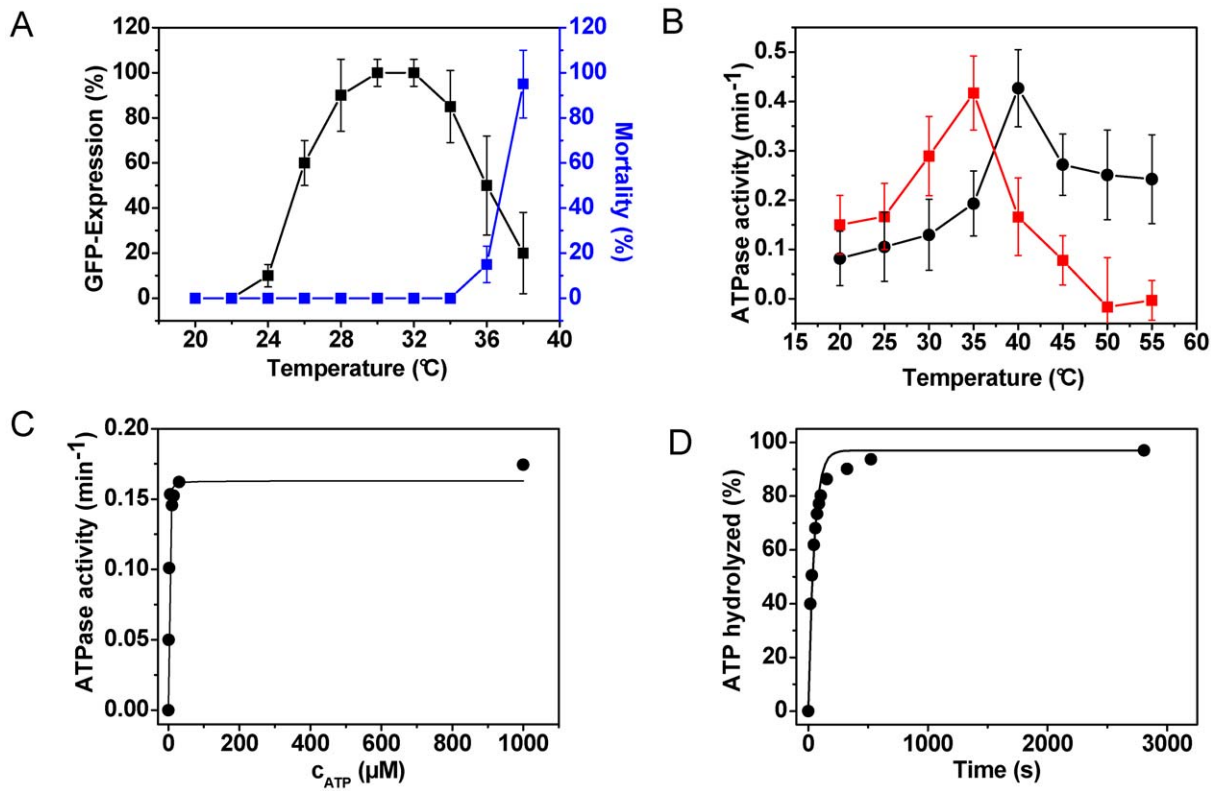

**Figure 1. Characterization of CeHsc70.** (A) The induction of the heat-shock response (black squares, left ordinate) was analyzed by exposing a *hsp-70::GFP* containing *C. elegans* strain to different temperatures for two hours and scoring after a recovery time of twelve hours. For this experiment nematodes at YA stage were used. The worms were grown at 20°C before shifting them to the respective heat-shock temperature. The percentage of mortality in percent of deceased animals (blue squares, right ordinate) was determined from these samples as well. The values presented are an average of three independent experiments and the error bars represent the standard deviation. (B) The dependence of the ATPase rate of CeHsc70 (red squares) and HsHsc70 (black circles) was determined under steady-state conditions as described in the Materials and Methods section. The values represent the mean of three replicates with the corresponding standard deviation given as errors. (C) Determination of the  $K_M$ -value of CeHsc70 (●) for ATP in standard buffer at 25°C. Steady-state ATPase activities were determined for CeHsc70 at different ATP concentrations. The data were analyzed as described in the Materials and Methods section. (D) Single-turnover measurement of 20 μM CeHsc70 (●) in the presence of 4 μM ATP in standard buffer at 25°C. Data were analyzed as described in the Materials and Methods section.  
doi:10.1371/journal.pone.0033980.g001

proteins [27,29]. This acceleration has been observed for both, the bacterial system, composed of DnaK, DnaJ and GrpE [27,28,30–32] as well as the eukaryotic system, consisting of Hsp70, Hsp40 and Bag1 [29]. For bacteria, the full system of DnaK, DnaJ and GrpE is required to efficiently refold substrate proteins [30,33,34]. Contrarily, in eukaryotes the participation of Bag1 and other NEFs in the folding process has been reported to be paradoxically both: unfavorable [35,36] or supportive [37,38].

Despite its importance as a model of genetics and developmental biology, the Hsc70 system of *Caenorhabditis elegans* has not been analyzed *in vitro* to date. Using bioinformatics, the encoded Hsp70-like proteins can be assigned to the various compartments they work in [39]: One mitochondrial Hsp70-protein (HSP-6), two ER-based homologs (HSP-3 and HSP-4) and one ribosomally attached Hsp70-protein (F11F1.1) exist in addition to the cytosolic Hsc70/Hsp70 proteins mentioned before. For the sole and essential CeHsc70 protein only few studies provide biochemical and structural data [14,40]. With BAG-1, the CeHsc70 system features a shortened, distantly related, non-essential homologue of human Bag1 [41,42]. One Sis1 (or DNAJB) homolog can be found in *C. elegans*: DNJ-13. It appears to be essential [42]. In this study, we address the biochemical characteristics of nematodal Hsc70 and its cofactors DNJ-13 and BAG-1. In this context, we also investigate the contribution of the helical lid to the regulation of the high

turnover rate and the rate-limiting step of the CeHsc70 ATPase, the protein's affinity towards cofactors, and its ability to refold proteins.

## Results

### The high ATPase activity of CeHsc70 is limited by nucleotide release

We purified recombinant His<sub>6</sub>-CeHsc70 (referred to as CeHsc70 throughout the manuscript) and studied the ATPase cycle by a combination of steady-state and single-turnover experiments. Using an ATP-regenerating system we determined a  $k_{cat}$  of 0.18 min<sup>-1</sup> for the steady-state hydrolysis rate at 25°C (Table 1). This is higher than values reported for the bacterial, yeast and mammalian proteins, which hydrolyze ATP at turnover rates of 0.05 min<sup>-1</sup>, 0.01 min<sup>-1</sup> and 0.1 min<sup>-1</sup>, respectively, at 30°C (Table 1 and [4,37,43–46]). This temperature is well above the optimal growth temperature of *C. elegans* and already in a range, where Hsp70 induction is strong as a part of the general heat-shock response in this organism (Figure 1A). In fact, the nematodal Hsc70 starts to unfold at 34°C (Figure S1). To study the above mentioned divergence in activity between the *C. elegans* and human protein (HsHsc70) more closely, we assessed the temperature dependence of the ATPase activity. Surprisingly, the

optimum of the ATPase rate of both proteins coincides with temperatures, considered lethal for both organisms (Figure 1B). Furthermore, both Hsc70 orthologs are - in a nucleotide-bound state - still stably folded at these temperatures (Figure S1). We determined the  $K_M$ -value of CeHsc70 to be  $<3 \mu\text{M}$  (Figure 1C). In order to determine the rate-limiting step of the ATPase reaction catalyzed by CeHsc70, we performed single-turnover experiments. In these experiments we used substoichiometric concentrations of ATP to determine the rate of the first hydrolysis step. Under single-turnover conditions CeHsc70 hydrolyzed ATP at a rate of  $1.29 \text{ min}^{-1} \pm 0.18 \text{ min}^{-1}$  (Table 1, Figure 1D). This rate is  $\sim 8$ -fold higher than the steady-state hydrolysis rate, which implies that the hydrolysis cycle of the nematodal Hsc70 protein is limited by the release of the ADP-molecule after the hydrolysis reaction. It also shows that the nematode's protein differs from many other Hsp70 chaperones analyzed before, which are mostly limited by ATP hydrolysis (Table 1 and [4]), suggesting a certain diversity in the enzymatic mechanism of Hsp70 proteins, despite the high level of sequence conservation.

### Truncations in the lid domain alter the rate-limiting step of the hydrolysis cycle

In order to understand which domains of CeHsc70 are responsible for the enzymatic activity, we generated C-terminal deletion fragments. As removal of the His<sub>6</sub>-tag from our protein only had minor impact on the ATPase rate (Figure S2), we designed the fragments accordingly and continued to work with the His<sub>6</sub>-tagged versions. While the overall amino acid sequence of CeHsc70 is strongly conserved, a high diversity can be found in the helical lid domain at the C-terminus (Figure 2A) [47]. Very little similarity is detectable between bacterial and metazoan Hsc70 proteins in this stretch of 130 amino acids. We generated fragments, which lack the whole substrate binding domain (CeHsc70- $\Delta 384$ ) or the C-terminal lid structure (CeHsc70- $\Delta 512$ ). Additionally, a fragment was created, lacking the very C-terminal helix bundle of the lid domain (CeHsc70- $\Delta 545$ ) retaining only helix A and half of helix B (Figure 2A and 2B) to avoid the generation of artificial hydrophobic interaction surfaces. We purified these fragments and confirmed that their tertiary structure was uncompromised by limited proteolytic digestion and thermal denaturation detected by circular dichroism (CD) and differential scanning fluorimetry (DSF). CD thermal transitions indicated the unfolding midpoint of secondary structure elements for all fragments to be in the range of 37–41°C (Figure S3A, Table 1).

Limited proteolysis also confirmed that the overall stability of the core protein was unaltered by the truncations (Figure S3B). DSF further stressed that the fragments are not destabilized compared to the full-length protein, all having a transition midpoint at 38°C (Figure S3C and S3D, Table 1). We also aimed at understanding the influence of nucleotides on the stability of the full-length protein and the fragments. We thus recorded DSF transitions in the presence of ADP and observed a shift of about 10°C in the transition midpoint of nematode and human Hsc70 (Figure S2). The same shift also was observable when using the truncation fragments  $\Delta 545$ ,  $\Delta 512$  (Figure S3C) and  $\Delta 384$  (Figure S3D), implying that neither the stability of the fragments nor the ability to bind nucleotides is compromised by the C-terminal truncations, which is also implied by the very tight binding observed in steady-state assays (Table 1). We further determined the ATPase activities of the truncation fragments. The steady-state turnover rates were only slightly affected: The isolated ATPase domain hydrolyzed ATP with a  $k_{\text{cat}}$  of  $0.21 \text{ min}^{-1}$ . CeHsc70- $\Delta 512$  and CeHsc70- $\Delta 545$  exhibited reduced ATPase activities of  $0.14 \text{ min}^{-1}$  and  $0.09 \text{ min}^{-1}$ , respectively (Table 1).

In order to determine the rate-limiting step of these variants, single-turnover experiments were performed. Here, the isolated ATPase domain, CeHsc70- $\Delta 384$ , exhibited a single-turnover hydrolysis rate of  $0.32 \text{ min}^{-1}$  (Figure 2C, Table 1). The similarity of steady-state and single-turnover rates suggests that the hydrolysis of the ATP molecule has become rate-limiting for this truncation variant. In contrast, a faster single-turnover hydrolysis rate of  $1.03 \text{ min}^{-1}$  was detected for CeHsc70- $\Delta 512$ , suggesting that sequences C-terminal of the ATPase domain accelerate the hydrolysis reaction and shift the rate-limiting step towards nucleotide release (Figure 2C, Table 1). Surprisingly, the presence of half the lid domain in CeHsc70- $\Delta 545$  resulted in a protein with dramatically slower single-turnover kinetics ( $0.08 \text{ min}^{-1}$ , Figure 2C, Table 1). This reaction is much slower than the single-turnover rate of the full-length protein and matches the steady-state turnover rate for this mutant. The concurrence of steady-state and single-turnover rates demonstrates that for CeHsc70- $\Delta 545$  the rate-limiting step is prior to or during the hydrolysis reaction. Based on these results, the helical lid domain of CeHsc70 has the potential to influence the rate-limiting step of the ATPase cycle and shift it between hydrolysis steps and nucleotide release.

### The NEF-function of nematodal BAG-1 is conserved for all truncation fragments

As truncations in the lid domain lead to alterations to the rate-limiting step of the CeHsc70 ATPase cycle, it is also interesting to learn how these alterations influence cofactor interactions. The dominant NEF for CeHsc70, BAG-1, is weakly conserved in *C. elegans* (Figure 3A), with the human protein being only 43% homologous within the BAG-domain and the N-terminal domain being absent. The BAG-domain binds to the NBD of Hsc70 and induces a conformation unable to bind nucleotide [48]. A previous structural study of the isolated nematodal BAG-domain revealed that this protein is potentially dimeric and that the binding site for CeHsc70 is structurally altered compared to human Bag1 [41].

We purified full-length BAG-1 and tested its interaction with CeHsc70 and fragments of CeHsc70 by employing analytical ultracentrifugation (AUC). To this aim, we labeled BAG-1 at its internal cysteine residue Cys7 (\*BAG-1) and performed sedimentation experiments in the absence and presence of CeHsc70. \*BAG-1 sedimented with a sedimentation coefficient of 2.1 S and characteristics of a monomeric protein ( $s_{20,w} = 2.1 \pm 0.4 \text{ S}$ ;  $D_{20,w} = 7.36 \cdot 10^{-7} \pm 1.5 \cdot 10^{-7} \text{ m}^2 \text{ s}^{-1}$ ;  $MW \sim 23.5 \text{ kDa}$ ). While

**Table 1.** Biophysical and enzymatic characterization of lid domain mutants.

|                       | $T_M$ DSF | $T_M$ CD | $K_M$ | $k_{\text{cat}}$                 | $k_{\text{hyd}}$                 |
|-----------------------|-----------|----------|-------|----------------------------------|----------------------------------|
| CeHsc70               | 39°C      | 38°C     | tight | $0.18 \pm 0.04 \text{ min}^{-1}$ | $1.29 \pm 0.18 \text{ min}^{-1}$ |
| CeHsc70- $\Delta 384$ | 39°C      | 38°C     | tight | $0.21 \pm 0.04 \text{ min}^{-1}$ | $0.32 \pm 0.05 \text{ min}^{-1}$ |
| CeHsc70- $\Delta 512$ | 39°C      | 41°C     | tight | $0.14 \pm 0.02 \text{ min}^{-1}$ | $1.03 \pm 0.41 \text{ min}^{-1}$ |
| CeHsc70- $\Delta 545$ | 39°C      | 37°C     | tight | $0.09 \pm 0.02 \text{ min}^{-1}$ | $0.08 \pm 0.02 \text{ min}^{-1}$ |

ATPase activities were determined in standard buffer as described in the Materials and Methods section. The  $K_M$ -determination was carried out at  $2 \mu\text{M}$  protein concentration and curves showed very tight binding and full saturation at stoichiometric concentrations, implying that the  $K_M$  value is smaller than or around  $2 \mu\text{M}$ . Consequently, Michaelis-Menten conditions are not maintained and a determination of an apparent  $K_D$  value is not permitted by this experimental setup (indicated by "tight").  $K_D$  denotes the apparent affinity. The errors represent standard deviations of three independent experiments.

doi:10.1371/journal.pone.0033980.t001

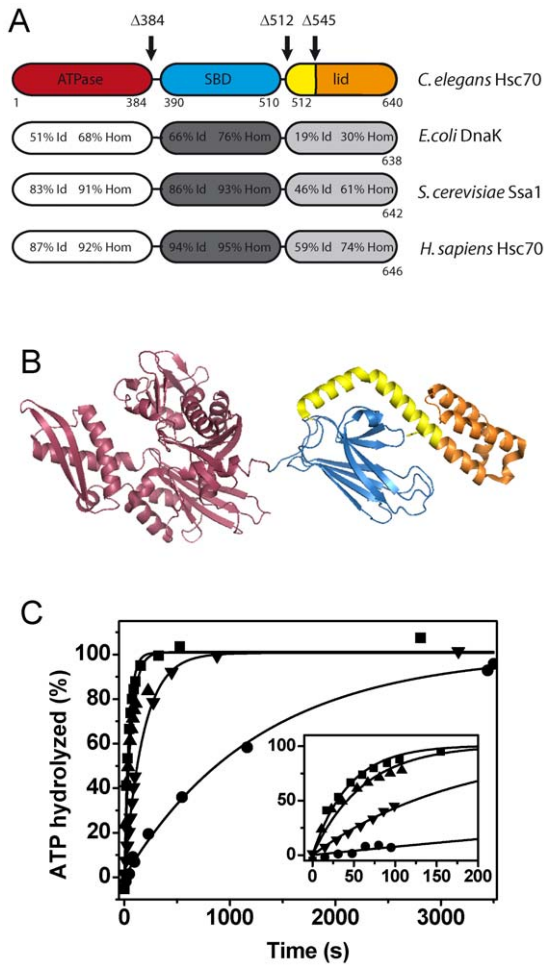

**Figure 2. CeHsc70 truncation mutants show an altered ATP turnover.** (A) Domain organization and amino acid identity (Id) and homology (Hom) of CeHsc70 towards bacterial, yeast and human homologs. The truncation mutants generated in this work are indicated by black arrows. (B) Structure of DnaK based on the PDB file 2KHO [93]. The truncations are colored in red (CeHsc70-Δ384), red and blue (CeHsc70-Δ512) and red, blue and yellow (CeHsc70-Δ545). The lid region, which is missing in the CeHsc70-Δ545 mutant, is highlighted in orange. (C) The single-turnover experiments using 20 μM CeHsc70 variants were performed as outlined in the Material and Methods section in standard buffer at 25°C. Data for CeHsc70-Δ384 (▼), CeHsc70-Δ512 (▲), CeHsc70-Δ545 (●) and CeHsc70 (■) were fit to single exponential functions. The inset shows the initial phase of the hydrolysis reaction within the first 200 s. doi:10.1371/journal.pone.0033980.g002

this does not support the dimeric structure, which was proposed based on the crystal contact interfaces [41], the monomeric nature matches earlier studies on mammalian Bag1 [49]. Binding to CeHsc70 was strong and resulted in a protein complex at 4.8 S (Figure 3B). This value is somewhat larger than the  $s_{20,w}$ -value of monomeric CeHsc70, which is 4.3 S (own data and [50] for human Hsc70). Binding to \*BAG-1 was also observed for the other variants of CeHsc70 (Figure 3B).

We further utilized this AUC assay to determine the influence of nucleotides on the binding between \*BAG-1 and CeHsc70. In the presence of 4 mM ATP, the \*BAG-1•CeHsc70 interaction was strongly suppressed. Only 22% of \*BAG-1 bound to CeHsc70 compared to the nucleotide free set-up, where >85% of \*BAG-1 were part of CeHsc70-containing complexes (Figure 3C). ADP,

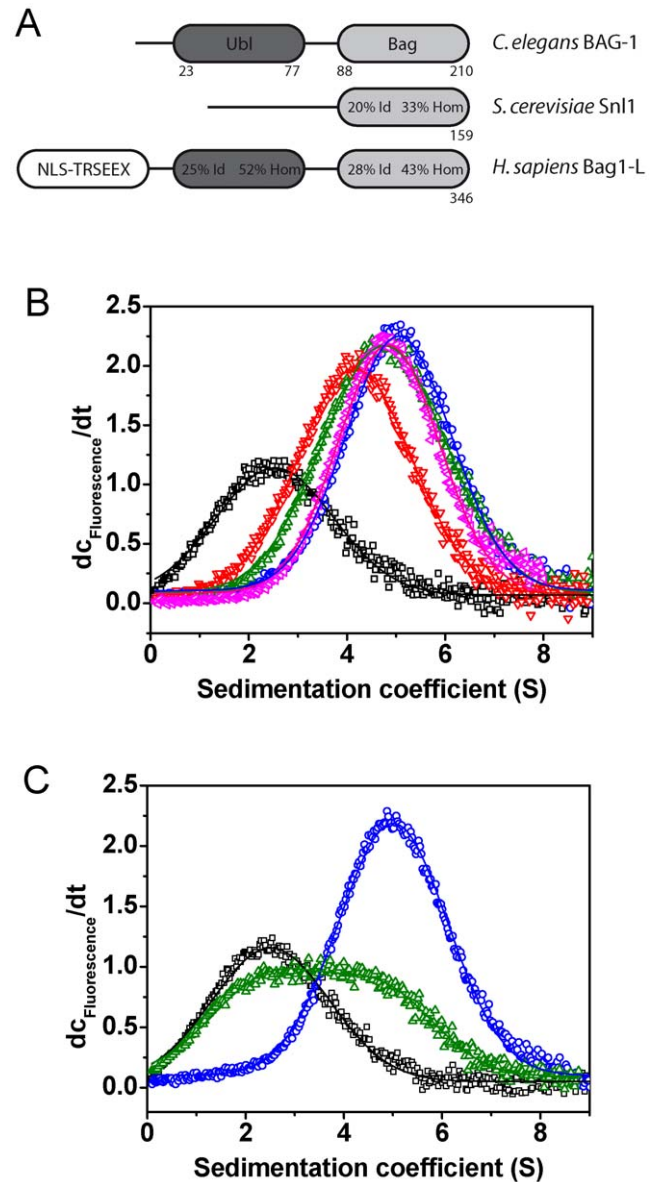

**Figure 3. The function of the NEF BAG-1 is conserved in context with CeHsc70.** (A) Domain organization of BAG-1 homologs from *C. elegans*, *H. sapiens* and *S. cerevisiae*. Percentages relate to identical (Id) and homolog (Hom) residues in respect to the nematode protein (Ubl: ubiquitin-like domain, Bag: BAG-domain, NLS: nuclear localization signal, TRSEEX: region containing multiple repetitions of the pentapeptide TRSEEX). (B)  $dc/dt$  plots were generated from sedimentation velocity experiments of 300 nM \*BAG-1 in the absence (black) or presence of 3 μM CeHsc70 (blue) or 3 μM of the isolated ATPase domain CeHsc70-Δ384 (red), the full lid-deletion CeHsc70-Δ512 (green) and the half-lid deletion construct CeHsc70-Δ545 (pink). (C)  $dc/dt$  plots were generated from sedimentation velocity experiments of 300 nM \*BAG-1 alone (black) or in the presence of 3 μM CeHsc70 (blue). The influence of nucleotides was analyzed by addition of 4 mM ATP (green) to 300 nM \*BAG-1 and 3 μM CeHsc70. Data were analyzed as described in the Materials and Methods section. doi:10.1371/journal.pone.0033980.g003

AMP-PNP and ATPγS also suppressed the binding of \*BAG-1 to CeHsc70. This disruptive effect of nucleotides on BAG-1 binding implies that the function of BAG-1 as a nucleotide exchange factor for Hsc70 is conserved in the nematode system.

We tested the effect of BAG-1 on the hydrolysis activity of CeHsc70 and its truncation fragments. As shown for other eukaryotic systems [29,38], addition of BAG-1 slightly stimulated the steady-state turnover rate of CeHsc70 (Table 2), but it dramatically reduced the rate in single-turnover assays (Table 2). Reduced single-turnover rates were obtained for all CeHsc70 truncation fragments, implying that the single-turnover condition of full nucleotide binding is not satisfied any more in the presence of BAG-1, likely due to a strongly reduced affinity for nucleotides (Table 2). In steady-state assays instead, the strongest stimulation was observed for CeHsc70- $\Delta$ 512, while no stimulation was observed for CeHsc70- $\Delta$ 545 (Table 2). Based on the known function of human Bag1 as NEF, it would be intuitive to find that the ATPase stimulatory effect on CeHsc70- $\Delta$ 545 is the weakest. Likely, a CeHsc70-fragment, whose enzymatic turnover is not limited by nucleotide-release, may gain very little from the function of BAG-1.

### DNJ-13 forms large ATP-dependent complexes with CeHsc70

The Hsp40-like protein DNJ-13 is the closest relative to yeast Sis1 and human DNAJB5 to be found in *C. elegans* (Figure 4A). We subcloned and purified recombinant DNJ-13. Steady-state ATPase measurements revealed that a twofold increase of the ATP turnover of CeHsc70 in the presence of DNJ-13 can be obtained. Also the lid domain truncations are stimulated by DNJ-13 (Figure 4B, Table 2), but not CeHsc70- $\Delta$ 384. It is interesting to note, that CeHsc70- $\Delta$ 545 shows the lowest apparent affinity ( $K_{D,app} \sim 4 \mu\text{M}$ ), while the interaction with CeHsc70- $\Delta$ 512 is very strong, implying that the helical lid domain is not required for the interaction of the J-domain protein with CeHsc70.

In single-turnover experiments only a small increase in the hydrolysis rate of CeHsc70 and CeHsc70- $\Delta$ 512 can be observed (Figure 4C, Table 2), despite the high affinity interaction (see Figure 4B, Table 2). Again, no stimulation is observed for CeHsc70- $\Delta$ 384. Interestingly, CeHsc70- $\Delta$ 545 which interacts most weakly with DNJ-13 is stimulated the most. This may be due to the shift of the rate-limiting step fully towards nucleotide-release in the presence DNJ-13 (Figure 4C, Table 2). Other variants in turn, which are limited by nucleotide-release interact strongly, but are barely stimulated.

In order to gain a deeper understanding of the mechanisms of cofactor regulation, we addressed the complex formation between DNJ-13 and CeHsc70 directly. We labeled DNJ-13 and subjected it to AUC. \*DNJ-13 sedimented with a sedimentation coefficient of 4.0 S (Figure 4D) and the sedimentation and diffusion properties of a

dimeric protein ( $s_{20,w} = 4.0 \text{ S} \pm 0.6 \text{ S}$ ;  $D_{20,w} = 5.67 \cdot 10^{-7} \pm 1.13 \cdot 10^{-7} \text{ m}^2 \text{ s}^{-1}$ ; MW  $\sim 62 \text{ kDa}$ ), which is in agreement with DNJ-13 homologs from yeast [51] and bacteria [52]. The addition of CeHsc70 to \*DNJ-13 did not change the sedimentation properties (Figure 4D) suggesting that no binding happens under these conditions. Also, addition of ADP or the non-hydrolysable ATP analogs AMP-PNP and ATP $\gamma$ S did not result in detectable interaction with CeHsc70. However, in the presence of ATP, CeHsc70 and \*DNJ-13 formed a protein complex at 12 S (Figure 4D). It is important to note, that the molecular weight of a 12 S complex theoretically cannot be less than 210 kDa, but likely is larger. Thus, it can be assumed that in the presence of ATP, CeHsc70 binds to the \*DNJ-13 dimer and forms a protein complex, which might be heterotetrameric consisting of two CeHsc70 and two DNJ-13 molecules (222 kDa). As the formation of the \*DNJ-13•CeHsc70 complex was strictly dependent on the presence of ATP, DNJ-13 apparently specifically interacts with ATP-dependent conformations of CeHsc70, while other states are not recognized under these conditions. Analyzing the fragments of CeHsc70, we found CeHsc70- $\Delta$ 384 to exhibit complex formation, whereas CeHsc70- $\Delta$ 512 behaved similarly to CeHsc70. However, the binding of CeHsc70- $\Delta$ 545 is weaker and potentially more dynamic as evident from the smaller  $s_{20,w}$  value of the protein complex at 7.5 S. Thus, these results support the ATPase assays, where CeHsc70- $\Delta$ 545 also had shown a reduced apparent affinity for DNJ-13 (see Table 2).

### DNJ-13 and BAG-1 compete with each other's binding during the ATPase cycle

It has been described for other Hsp70 systems that the interaction of Hsp40-like proteins and nucleotide exchange factors is competitive and results in strong stimulation of the ATPase activity [29,30,53,54]. Indeed, upon addition of BAG-1 the large CeHsc70•\*DNJ-13•ATP complex was not detectable anymore and only small species corresponding to mostly unbound \*DNJ-13 could be seen (Figure 5A). Thus, BAG-1 has the ability to disrupt \*DNJ-13•CeHsc70 complexes that are formed in the presence of ATP.

We also analyzed the ATPase activity of the CeHsc70-variants in the presence of both cofactors. We added DNJ-13 to CeHsc70 in the presence of 2  $\mu\text{M}$  BAG-1 and observed a remarkable stimulation of ATP hydrolysis (Figure 5B). Nevertheless, in contrast to the stimulation in absence of BAG-1, now the apparent affinity is weak ( $K_{D,app} = 6.8 \mu\text{M} \pm 3.2 \mu\text{M}$ ), highlighting the competitive interaction between the two cochaperones. The interaction with CeHsc70- $\Delta$ 545 appears even weaker exhibiting an almost linear increase during titration up to 25  $\mu\text{M}$  DNJ-13

**Table 2.** Enzymatic parameters of cofactor interactions with lid domain mutants.

|                       | Single-turnover                    |                                           |                                            | Steady-state                       |                                           |                                   |                                            |                                    |
|-----------------------|------------------------------------|-------------------------------------------|--------------------------------------------|------------------------------------|-------------------------------------------|-----------------------------------|--------------------------------------------|------------------------------------|
|                       | $k_{hyd}$<br>( $\text{min}^{-1}$ ) | $k_{hyd, BAG-1}$<br>( $\text{min}^{-1}$ ) | $k_{hyd, DNJ-13}$<br>( $\text{min}^{-1}$ ) | $k_{cat}$<br>( $\text{min}^{-1}$ ) | $k_{cat, BAG-1}$<br>( $\text{min}^{-1}$ ) | $K_D, BAG-1$<br>( $\mu\text{M}$ ) | $k_{cat, DNJ-13}$<br>( $\text{min}^{-1}$ ) | $K_D, DNJ-13$<br>( $\mu\text{M}$ ) |
| CeHsc70               | 1.37 $\pm$ 0.18                    | 0.21 $\pm$ 0.08                           | 3.94 $\pm$ 0.34                            | 0.18 $\pm$ 0.04                    | 0.27 $\pm$ 0.03                           | tight                             | 0.43 $\pm$ 0.06                            | tight                              |
| CeHsc70- $\Delta$ 384 | 0.32 $\pm$ 0.05                    | 0.03 $\pm$ 0.01                           | 0.41 $\pm$ 0.04                            | 0.21 $\pm$ 0.04                    | 0.22 $\pm$ 0.04                           | n.d.*                             | 0.23 $\pm$ 0.04                            | n.d.*                              |
| CeHsc70- $\Delta$ 512 | 1.01 $\pm$ 0.39                    | 0.16 $\pm$ 0.10                           | 3.34 $\pm$ 0.27                            | 0.14 $\pm$ 0.02                    | 0.45 $\pm$ 0.10                           | 6.5 $\pm$ 3.2                     | 0.44 $\pm$ 0.05                            | tight                              |
| CeHsc70- $\Delta$ 545 | 0.08 $\pm$ 0.03                    | 0.02 $\pm$ 0.03                           | 14.38 $\pm$ 2.06                           | 0.09 $\pm$ 0.02                    | 0.14 $\pm$ 0.03                           | n.d.*                             | 0.58 $\pm$ 0.10                            | 4.2 $\pm$ 2.2                      |

ATPase activities were determined in standard buffer as described in the Materials and Methods section. DNJ-13 stimulation or BAG-1 inhibition were not observed in some experiments (denoted by "n.d."). Consequently an apparent  $K_D$  cannot be deduced. The semi-quantitative value "tight" points to the fact that in the respective experiment, quantitative binding appeared substoichiometric. Consequently, no reasonable data fitting can be performed, using the normal absorption isotherm.  $K_D$  denotes the apparent affinity. The errors represent standard deviations of three independent experiments.

doi:10.1371/journal.pone.0033980.t002

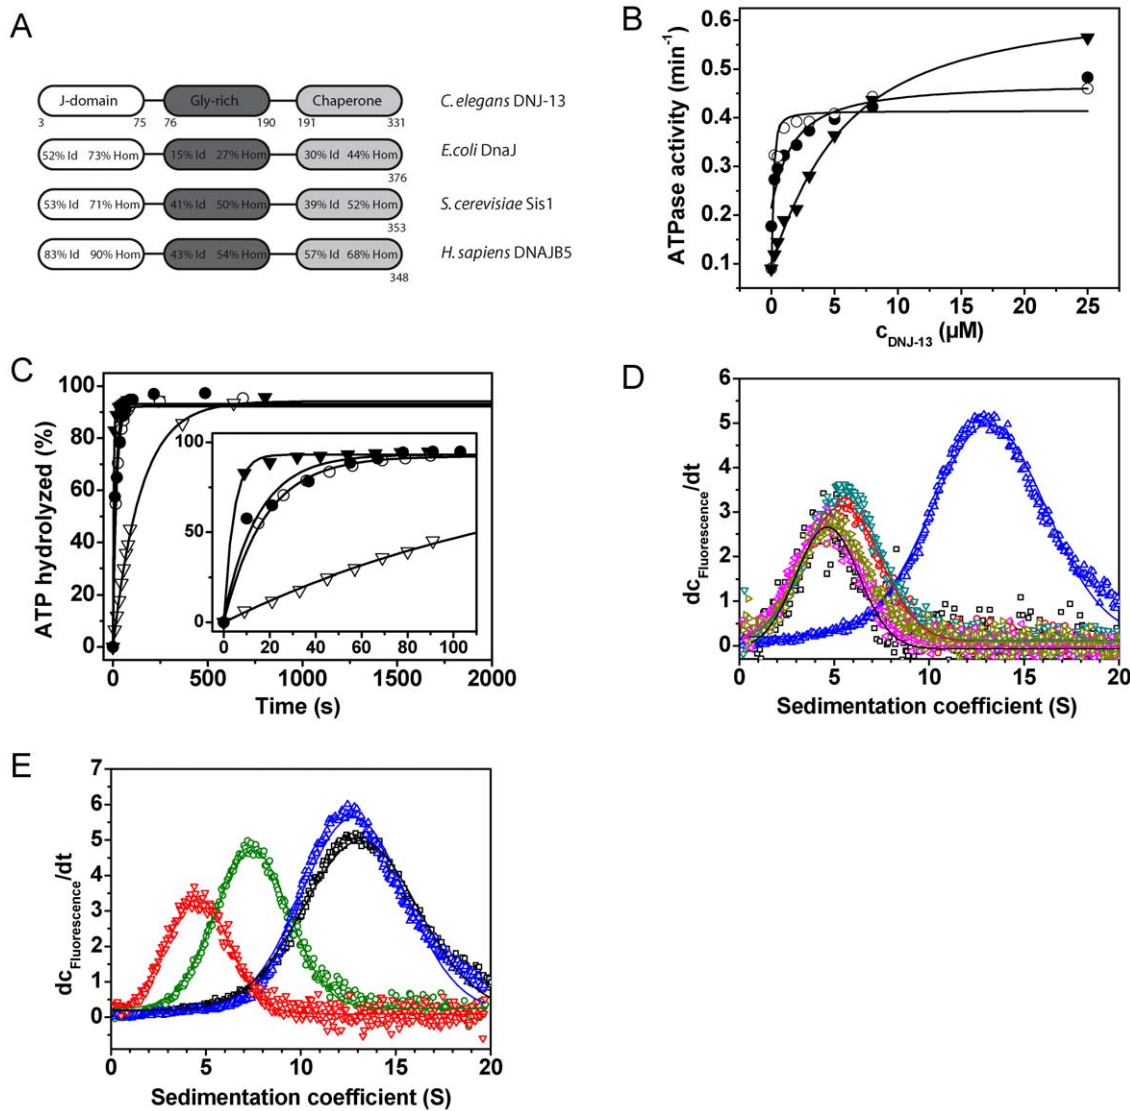

**Figure 4. DNJ-13 interacts with CeHsc70 in presence of ATP and is released by BAG-1.** (A) Domain organization of DNJ-13 homologs from *C. elegans*, *E. coli*, *S. cerevisiae* and *H. sapiens*. Percentages relate to identical (Id) and homolog (Hom) residues in respect to the nematode protein. (B) Steady-state ATPase activities were measured in the presence of increasing amounts of DNJ-13 for either CeHsc70 (●), CeHsc70- $\Delta$ 512 (○) or CeHsc70- $\Delta$ 545 (▼). Data were analyzed as described in the Materials and Methods section. (C) Single-turnover measurements of 10  $\mu\text{M}$  CeHsc70- $\Delta$ 384 (▽), CeHsc70- $\Delta$ 512 (○), CeHsc70- $\Delta$ 545 (▼) and CeHsc70 (●) in the presence of 15  $\mu\text{M}$  DNJ-13. All data points were fit to single exponential functions. (D)  $dc/dt$  plots were generated from sedimentation velocity experiments of 300 nM \*DNJ-13 in the absence (black) or in the presence of 3  $\mu\text{M}$  CeHsc70 (pink). The influence of nucleotides was analyzed by addition of 4 mM of either ADP (gold), AMP-PNP (red), ATP $\gamma$ S (turquoise) or ATP (blue) to 300 nM \*DNJ-13 and 3  $\mu\text{M}$  CeHsc70. (E)  $dc/dt$  profiles of sedimentation velocity experiments of 300 nM \*DNJ-13 in the presence of either 3  $\mu\text{M}$  CeHsc70 (blue), CeHsc70- $\Delta$ 384 (red), CeHsc70- $\Delta$ 512 (black) or CeHsc70- $\Delta$ 545 (green) in the presence of ATP. doi:10.1371/journal.pone.0033980.g004

(Figure 5B). Only for CeHsc70- $\Delta$ 512•BAG-1 complexes, a saturation curve could be observed ( $K_{D,\text{app}} = 1.2 \mu\text{M} \pm 0.4 \mu\text{M}$ ), confirming the high apparent affinity of this truncation variant for DNJ-13. Thus, also in these assays the truncation mutants CeHsc70- $\Delta$ 545 and CeHsc70- $\Delta$ 512 behaved differently and in analogy to the analysis of the binary complexes (see Figure 4B and 4D), DNJ-13 binds more strongly to CeHsc70- $\Delta$ 512 compared to CeHsc70- $\Delta$ 545.

#### Substrate refolding by CeHsc70 requires optimal concentrations of BAG-1 and DNJ-13

It is not fully understood, how the two cochaperones contribute to the folding activity of Hsc70 in the eukaryotic system. In

particular, nucleotide exchange factors had been found to have both supportive and inhibitory functions in eukaryotes [35–38,55]. We analyzed the refolding activity of CeHsc70 on denatured luciferase in the absence and presence of DNJ-13 and BAG-1. CeHsc70 alone was not able to refold luciferase, while addition of DNJ-13 resulted in refolding activity (Figure 6A). Addition of substoichiometric amounts of BAG-1 increased the refolding efficiency further (Figure 6A and 6B), but higher concentrations of BAG-1 reduced it to baseline levels (Figure 6B) revealing a clear optimum of NEF concentrations similar to the prokaryotic system [56]. We were interested, whether ATP hydrolysis followed the same trend. The efficiency of luciferase refolding does not correspond to ATPase activities measured under identical

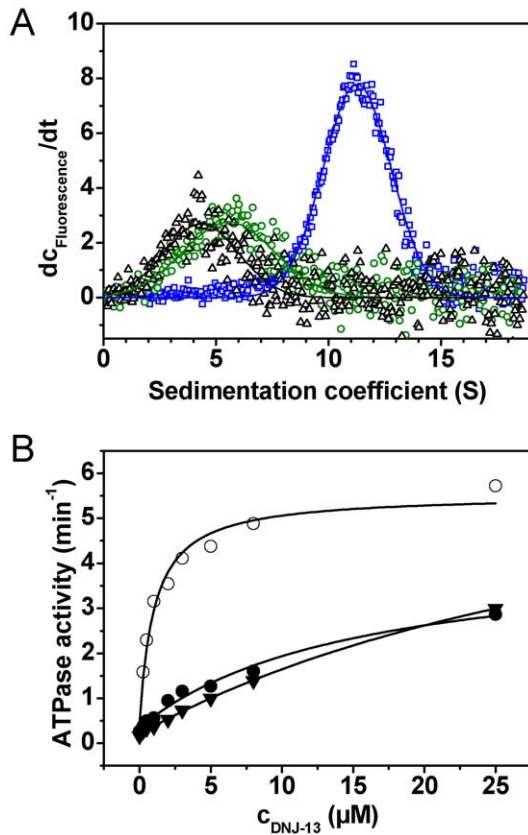

**Figure 5. The ternary interaction of CeHsc70 with BAG-1 and DNJ-13 is affected by the lid domain truncations.** (A)  $dc/dt$  plots were generated from sedimentation velocity experiments of 300 nM \*DNJ-13 in the absence (black) or in the presence of 3  $\mu\text{M}$  CeHsc70 and 4 mM ATP (blue). The influence of BAG-1 on complex formation was analyzed by addition of 15  $\mu\text{M}$  BAG-1 to \*DNJ-13-CeHsc70-ATP (green). (B) The ATPase activity of 1  $\mu\text{M}$  CeHsc70 (●), CeHsc70- $\Delta$ 512 (○) or CeHsc70- $\Delta$ 545 (▼) was measured with increasing amounts of DNJ-13 in the presence of 2  $\mu\text{M}$  BAG-1 in standard buffer at 25°C. Data analysis was performed as described in Materials and Methods. doi:10.1371/journal.pone.0033980.g005

conditions, implying that these two processes – optimal folding activity and maximal ATP hydrolysis – are independent and do not share the same cochaperone requirements (Figure 6B). Interestingly though, the positive influence of BAG-1 on the hydrolysis rate vanishes at high concentrations, suggesting that in ATPase assays also a competitive inhibition of the system may become observable.

Having shown that the truncations in the lid domain do not prevent ATP hydrolysis and interaction with CeHsc70 cofactors, we aimed at elucidating the influence of these deletions on the protein folding activity. Under neither concentration of cofactors, we were able to regain luciferase activity above the baseline level (Figure 6C), implying that in similarity to the human system [22,57] the presence of the lid domain, while not essential for hydrolysis and cofactor interactions, is required for the functional activity of the Hsc70 chaperone machinery from *Caenorhabditis elegans*.

## Discussion

### Regulation of the CeHsc70 ATPase cycle by the helical lid domain

We analyzed the Hsc70 system of *C. elegans* by utilizing truncation mutants in the C-terminal lid domain. It is evident

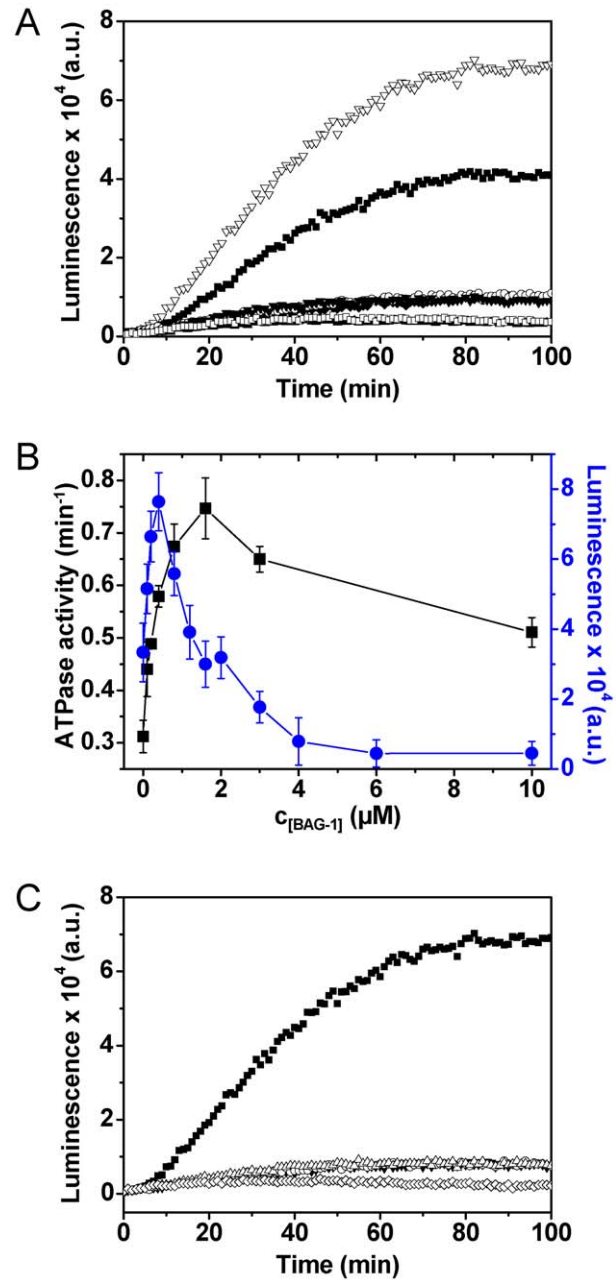

**Figure 6. Lid domain truncations reduce the refolding ability of CeHsc70.** (A) Kinetics of firefly luciferase refolding in the presence of different chaperone combinations: CeHsc70/DNJ-13/BAG-1 (▽), CeHsc70/DNJ-13 (■), CeHsc70/BAG-1 (◆), CeHsc70 (○), BAG-1 (□) and DNJ-13 (▼). Additionally the luminescence of a sample without chaperones and cofactors was analyzed (▲). Protein concentrations were 3.2  $\mu\text{M}$  CeHsc70, 0.8  $\mu\text{M}$  DNJ-13 and 0.4  $\mu\text{M}$  BAG-1. Luciferase refolding assays were carried out as described in Material and Methods. (B) Steady-state ATPase activities (black squares, left ordinate) and luciferase refolding efficiency (blue circles, right ordinate) were determined for 3.2  $\mu\text{M}$  CeHsc70 and 0.8  $\mu\text{M}$  DNJ-13 at different BAG-1 concentrations under standard conditions. (C) The luciferase refolding activity of either CeHsc70 (■), CeHsc70- $\Delta$ 545 (▼), CeHsc70- $\Delta$ 512 (○) or CeHsc70- $\Delta$ 384 (△) was determined in the presence of DNJ-13 and BAG-1. Additionally a control without chaperones and cofactors (◇) was recorded. doi:10.1371/journal.pone.0033980.g006

from our data that all domains participate during the hydrolysis reaction: The isolated ATPase domain (CeHsc70- $\Delta$ 384) can hydrolyze ATP, but more C-terminal regions stimulate the intrinsic hydrolysis reaction. As studies on other model organisms suggest, conformational changes in CeHsc70 lead to a hydrolysis-competent state. The initial segment of the lid-domain can apparently inhibit this process by slowing down these pre-hydrolysis conformational changes (Figure 7). Structures at the C-terminus of the lid domain (amino acid 545 to 640) obviously reduce this inhibitory effect, giving the helical lid inhibitory as well as reactivating parts. Previous studies reported that ATP binding induces conformational changes in the lid leading to its displacement away from the peptide binding site [58,59]. Based on our data, we can establish a model (Figure 7), in which lid truncation mutants can shift the conformational equilibrium either towards the hydrolysis competent state (CeHsc70- $\Delta$ 512) or towards the pre-hydrolysis state (CeHsc70- $\Delta$ 545). CeHsc70 apparently more closely resembles CeHsc70- $\Delta$ 512, as its turnover also is limited by nucleotide release. While it cannot be excluded that parts of the truncated lid domain imitate a bound substrate protein in CeHsc70- $\Delta$ 545 [60,61], the reduced hydrolysis rate, however, renders this scenario unlikely. Usually Hsp70 hydrolysis is stimulated in the presence of client proteins [62,63]. Interestingly, intermediate lid-truncations in DnaK, corresponding to CeHsc70- $\Delta$ 545, showed a 2–8 fold activation of steady-state hydrolysis, suggesting that in this case the lid indeed may have served as an internal substrate [64], while the almost lid-free truncation only showed slight effects [65].

#### Association of the cofactors DNJ-13 and BAG-1 with CeHsc70

It is interesting to see, that also the binding of the Hsc70 cofactors BAG-1 and DNJ-13 is influenced by lid deletions. Clearly, in CeHsc70 the lid domain is not required to bind DNJ-13 or BAG-1. As observed for the bacterial system [66,67], CeHsc70- $\Delta$ 512 can be stimulated by its J-protein DNJ-13. Thus, it is likely that the changes in cofactor affinities result from alterations to the conformational cycle and the rate-limiting step, which are due to the deletions in the lid domain.

DNJ-13 binds more weakly to the “open” CeHsc70- $\Delta$ 545 than to the hydrolysis-competent CeHsc70- $\Delta$ 512 or CeHsc70. It is intriguing that the conformational changes in response to ATP-binding provide the platform for the high-affinity interaction with DNJ-13. In similarity to the ATP hydrolysis reaction itself, the initial segment of the lid domain acts as an inhibitor of the CeHsc70•DNJ-13 interaction. The competitive binding of BAG-1 and DNJ-13 suggests that competition is generated by favoring a specific conformation during the hydrolysis cycle, which excludes or reduces the apparent affinity of the other cofactor. As such, the presence of BAG-1 weakens the apparent binding constant of DNJ-13 (see Figure 5B). It is generally interesting to note that the strongest effects on ATP turnover occur during the weak cofactor interactions. This is intuitive, as for a productive acceleration of the hydrolysis reaction an unfavorable conformational transition has to be overcome by cofactor binding.

#### Conservation of the Hsc70 system in nematodes

A large number of studies exist on the hydrolysis reaction of Hsc70 proteins from other model organisms and the regulation of their activity by substrate proteins and cofactors. In particular, the DnaK-system of *E. coli* has been characterized in considerable detail. Several mutations in DnaJ and DnaK have been described, which disrupt the binding of cofactors and a mechanism of the interaction had been postulated that explains the stimulation of the

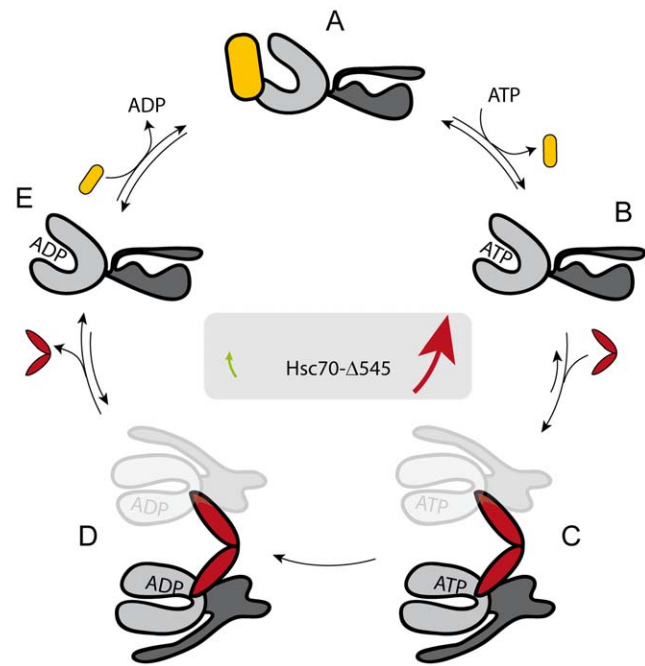

**Figure 7. A model for the regulation of CeHsc70's ATPase by the lid domain.** A structural hypothesis for the regulation of the CeHsc70 ATPase cycle may be formulated based on the structures 2KHO of DnaK (74) and 3D2E of the Hsp70-homolog protein Sse1 (75). After initial binding of ATP to the NBD of CeHsc70 (Step A→B), conformational changes result in a hydrolysis competent conformation (Step B→C). This reaction is favored in CeHsc70, as evident from the observation, that hydrolysis is not rate-limiting. The helical lid likely regulates the equilibrium or the kinetics of the B→C transition, as this reaction appears to be much slower in CeHsc70- $\Delta$ 545. DNJ-13 (red) accelerates the formation of the hydrolysis-competent conformation and thus promotes ATP hydrolysis. ATP hydrolysis likely is irreversible (Step C→D). After hydrolysis, DNJ-13 leaves the complex and Hsc70 returns to its open conformation (Step D→E). BAG-1 (yellow) acts to displace the nucleotide (Step E→A). Based on this model, simultaneous BAG-1 and DNJ-13 binding to CeHsc70 would be mutually exclusive, although several intermediate steps might exist during this sophisticated cycle.

doi:10.1371/journal.pone.0033980.g007

ATPase rate of DnaK in the presence of DnaJ [25,66–79]. Substrate-lid truncations in DnaK have been characterized and revealed effects on substrate binding and refolding activities, but only weak effects on ATP-hydrolysis [47,64,65]. The inhibitory properties of the lid domain, as observed for CeHsc70- $\Delta$ 545, have not been uncovered in these studies. It is important to note that strong differences exist between DnaK and the eukaryotic proteins, specifically within the helical lid domain, which is almost unrelated in terms of primary sequence. The function of the lid domain as an inhibitor of the intrinsic hydrolysis rate and thus the potential coupling of its motions to the hydrolysis reaction might hence be different in the bacterial system [47,80]. Fewer data are available for eukaryotic systems. In yeast, the very low hydrolysis rates of Ssa1 and Ssa2 render comparison to the nematode system difficult [43]. The best eukaryotic match might be the mammalian system, but no systematic analysis of lid truncations has been performed here yet. As a consequence, it remains to be determined, whether the effects observed in our study are of general importance to all Hsp70 systems or whether they represent a specialty of *C. elegans*. Our data comparing the activity and stability of the human and nematodal versions of Hsc70 point to the fact that the slightly higher basal activity of CeHsc70 at equal



temperatures may be due to a shifted activity and stability optimum that coincides surprisingly well to the optimum growth or body temperature of both organisms.

Also, regarding the interaction between Hsc70 and Hsp40 a wealth of data exists. The strict dependence of the Hsc70/J-protein interaction on the presence of ATP has been observed in studies using Hsp70-systems from bacteria, eukaryotes and organelles [18,74,75,77,81,82]. However, recent data on the ER-resident Hsp70-system highlight that for some systems complex formation is also possible in the presence of ADP [83] and consequently the regulation may be more complex. Also, DnaJ•DnaK complexes have been observed in the presence of ADP during NMR experiments [77]. For the *C. elegans* system, we observe complex formation only in the presence of ATP, but based on the fast ATP hydrolysis rates, it has to be assumed that in the observed assemblies hydrolysis has taken place and the interaction also may happen as a post-hydrolysis DNJ-13•CeHsc70•Mg-ADP-P<sub>i</sub> complex. As AUC only provides very limited kinetic information, the dissociation rate of this complex cannot be determined. Still, it is unlikely that the complex is assembled at all stages of the ATPase cycle, suggesting that the nucleotide-release controlled steady-state hydrolysis rate of 0.43 min<sup>-1</sup> to 0.58 min<sup>-1</sup> (Table 2) serves as an upper limit for the complex stability.

It is surprising that large DNJ-13•CeHsc70•Mg-ADP-P<sub>i</sub> complexes are formed during AUC. As Hsp40-like proteins contain dimerization sequences at the C-terminus, the formation of these assemblies as heterotetrameric complexes appears possible. Certainly, it cannot be ruled out that a combination of specific and unspecific interactions leads to the formation of these assemblies [84]. Given the high concentration of CeHsc70 and the presence of substoichiometric amounts of DNJ-13 in the luciferase-refolding assays, it is also possible that this multimeric protein complex may serve as a functional species in the refolding of firefly luciferase.

## Materials and Methods

### Worm handling and analysis of the heat-shock response

Worms were handled according to standard procedures and grown on NGM plates seeded with OP50 bacteria. To analyze the heat-shock response worms were synchronized and grown for four days on NGM plates at 20°C to obtain young adult worms (YA stage). Plates containing on average 100 nematodes were sealed in plastic bags and heat-shocked at different temperatures in a water bath for two hours. Plates were removed from the plastic bags and returned to the 20°C incubator. After 12 hours the GFP expression was localized and quantified by visual inspection. “100% induction” required bright expression in all nematodes on the plate in the following cells: pharyngeal muscle cells, intestinal rings 1, 8 and 9, both spermathecae, body wall muscle cells and a visible induction in hypodermal cells. Incomplete induction patterns or heterogeneity between individual worms was evaluated by intermediate %-values. Survival was scored based on the recovery of nematodes from the heat-shock after 24 hours. The experiment was repeated three times. The strain containing the integrated *hsp-70::GFP* construct was a kind gift of Richard I. Morimoto (Northwestern University, Evanston, IL, USA).

### Sequence alignments and determination of homologies

The domain boundaries were defined according to the Conserved Domain Database after a conserved domain query on the protein sequence (<http://blast.ncbi.nlm.nih.gov/>). In order to determine the degree of conservation within one domain,

identical and homologous residues, as identified by the BLAST alignment tool, were determined and percentage values for each domain were calculated.

### Expression clones and protein purification

Expression plasmids for His<sub>6</sub>-fused CeHsc70 fragments were generated based on the pET28a (Merck KGaA, Darmstadt, Germany) plasmid as described earlier [14]. The coding sequence of *dnj-13* was cloned into the pET28a vector for protein expression using a full-length cDNA clone of *dnj-13* in the RNAi plasmid L4440 (Thermo Scientific, Huntsville, AL, USA) as a template. To clone *bag-1*, a cDNA preparation of *C. elegans* nematodes was generated, using the Qiagen RNAeasy kit (Qiagen, Hilden, Germany) and reverse transcriptase (Promega, Madison, WI, USA) with a polyT-primer according to the manufacturer's protocol.

Proteins were expressed in the *E. coli* BL21-CodonPlus (DE3)-RIL strain (Agilent Technologies, Santa Clara, CA, USA). Bacteria were grown to an OD<sub>600</sub> of 0.8 and expression was induced with 1 mM IPTG. After four hours, bacterial cells were harvested and resuspended in 40 mM HEPES/KOH, pH 7.5, 300 mM KCl. Bacterial cells were lysed using the cell disruption instrument TS 0.75 (Constant Systems Ltd., Northants, UK) and the soluble fraction was applied to a HisTrap 5 ml column (GE Healthcare, Chalfont St Giles, UK). The protein was eluted with disruption buffer containing 300 mM imidazole. CeHsc70 and BAG-1 were further purified using ResourceQ ion exchange chromatography and size exclusion chromatography on a Superdex 75 HiLoad column (both GE Healthcare, Chalfont St Giles, UK). DNJ-13 was loaded onto a ResourceS ion exchange column and was further purified by size exclusion chromatography using a Superdex 75 HiLoad column (both GE Healthcare, Chalfont St Giles, UK). HsHsc70 was expressed as described previously [85] and purified on DEAE-Sepharose, Resource Q (both GE Healthcare, Chalfont St Giles, UK), Fluoroapatite (Bio-Rad, Hercules, CA, USA) and for polishing on Superdex 200 HiLoad (GE Healthcare, Chalfont St Giles, UK) columns. The purity of the proteins was determined to be more than 95% according to SDS-PAGE. Protein concentrations were 220 μM for BAG-1, 160 μM for DNJ-13 and 60 μM for CeHsc70. The His<sub>6</sub> tag was removed by digestion of 1 mg of His<sub>6</sub>-CeHsc70 with 5 U of thrombin (Merck KGaA, Darmstadt, Germany) according to the manufacturer's instructions and subsequent purification via a HisTrap 1 ml column (GE Healthcare, Chalfont St Giles, UK, see above). The removal of the tag did not affect the stability of CeHsc70 and its activity was increased within the range of error (compare Figure S2).

### Differential scanning fluorimetry

Differential scanning fluorimetry (DSF) was deployed to determine the unfolding temperature of CeHsc70, its fragments and HsHsc70 by monitoring an increase in the fluorescence of SYPRO orange upon binding to exposed hydrophobic parts of the protein [86]. The dye (Invitrogen, Carlsbad, CA, USA), is diluted 1:100 in buffer solution (40 mM HEPES/KOH pH 7.5, 150 mM KCl). This pre-mix is diluted again 1:10 in buffer solution containing 0.5 mg/ml CeHsc70. Temperature dependent unfolding of CeHsc70 and the resulting increase in fluorescence was measured in the Mx3000P qPCR System (Agilent Technologies, Santa Clara, CA, USA). Fluorescence reads were performed at a heating rate of 0.5°C/min every minute. All measurements were performed in triplicates. Melting curves were normalized and averaged. ADP was added to 2 mM where indicated.

### Circular dichroism thermal transitions

Circular dichroism (CD) temperature transitions were recorded in 40 mM HEPES, pH 7.5, 150 mM KCl at 217 nm. The heating rate was 0.5°C/min, starting at 12°C. Moving averaging at a window size of 5 datapoints was applied to the curves to reduce noise. The curves were normalized to allow comparison. The data were not fitted to obtain thermodynamic unfolding parameters, as transitions were irreversible.

### Steady-state ATPase activity measurements

Steady-state ATPase activities were determined as described earlier [14,87]. In short, an ATP-regenerating system was used, employing lactate dehydrogenase, NADH, phosphoenol pyruvate and pyruvate kinase in a buffer containing 40 mM HEPES/KOH, pH 7.5, 150 mM KCl, 5 mM MgCl<sub>2</sub>. Assays were started by addition of 2 mM ATP, the assay temperature was 25°C for all experiments, when not indicated differently.

The influence of cofactors on the CeHsc70 activity was analyzed by titration. The ATPase activities at different cofactor concentrations were fit to obtain apparent K<sub>D</sub>-values according to the following equation:

$$v = v_0 + (v_{\max} - v_0) * \frac{L_{tot}}{(L_{tot} + K_D)}$$

In cases where the apparent affinity of the interaction was so high that stoichiometric or substoichiometric binding was observed, the following equation was used:

$$v = v_{\max} + \frac{1}{2 * M_{tot}} * (v_{\max} - v_0) * \left( L_{tot} + K_D - M_{tot} - \sqrt{(L_{tot} + K_D - M_{tot})^2 + 4 * M_{tot} * K_D} \right)$$

### Single-turnover ATPase activity experiments

Single-turnover ATPase assays were based on the separation of [ $\alpha$ -<sup>32</sup>P]-ADP from [ $\alpha$ -<sup>32</sup>P]-ATP (Hartmann Analytic, Braunschweig, Germany) by thin layer chromatography [88]. 30  $\mu$ l of a solution containing 20  $\mu$ M CeHsc70 and 30  $\mu$ M DNJ-13 or BAG-1 in assay buffer (40 mM HEPES/KOH pH 7.5, 150 mM KCl, 5 mM MgCl<sub>2</sub>) were mixed to a final concentration of 5  $\mu$ M ATP containing 1.0  $\mu$ Ci [ $\alpha$ -<sup>32</sup>P]-ATP. At defined time points, aliquots of 3  $\mu$ l were withdrawn from the assay reaction and added to 2  $\mu$ l 100 mM EDTA, pH 8.0, to stop the hydrolysis reaction. 0.9  $\mu$ l of these aliquots were applied to polyethylenimine-cellulose plates (Merck Bioscience, Darmstadt, Germany) and chromatographically separated using a mobile phase of 0.5 M LiCl in 2 N formic acid. Evaluation of the chromatogram was performed using a Typhoon 9200 Variable Mode Imager (GE Healthcare, Chalfont St Giles, UK). Spot intensities were determined using ImageQuant (GE Healthcare, Chalfont St Giles, UK). The values were normalized and plotted against the reaction time. Data analysis was performed using single-exponential functions for all assays.

### Analytical ultracentrifugation with fluorescently labeled cofactors

Analytical ultracentrifugation (AUC) was performed using fluorescently labeled BAG-1 (\*BAG-1) and DNJ-13 (\*DNJ-13). BAG-1 was labeled at its sole cysteine residue at amino acid position 7 with Alexa Fluor 488 C<sub>5</sub>-maleimide (Invitrogen,

Carlsbad, CA, USA). DNJ-13 was labeled with 5-(and-6)-carboxyfluorescein succinimidylester (Invitrogen, Carlsbad, CA, USA) at neutral pH in order to obtain preferential labeling at the N-terminal amine group. Both labels were added to the protein (1 mg/ml) at a threefold molar excess upon continuous mixing. After 2 h of incubation at room temperature, unreacted label was quenched by adding DTT to a final concentration of 20 mM in the case of \*BAG-1 or an Tris to a final concentration of 100 mM in the case of \*DNJ-13. Free label was separated from the labeled protein by size-exclusion chromatography. The labeling efficiency of \*BAG-1 and \*DNJ-13 was determined using the manufacturer's guidelines and was found to be 0.95 and 1.2, respectively.

AUC was performed with a ProteomeLab XL-A ultracentrifuge (Beckman Coulter, Brea, CA, USA) equipped with a fluorescence detection system (Aviv Biomedical, Lakewood, NJ, USA). The centrifugation experiments in general were performed at 20°C at 42 000 rpm. Labeled protein at a concentration of 300 nM was sedimented in the absence and presence of binding partners and different nucleotides. Sedimentation velocity experiments were evaluated using dc/dt analysis as described before [89–91]. Species distributions in dc/dt plots were fit to Gaussian or bi-Gaussian functions in order to obtain the s<sub>20,w</sub> values of the observed sedimentation boundaries. It is important to note, that in particular when binding affinities are low and the interaction is dynamic, sedimentation boundary analysis, as employed by the dc/dt-approach, can result in a reduced s<sub>20,w</sub> value compared to an irreversible protein complex of the same composition. Full analysis of sedimentation runs, as performed for \*BAG-1 and \*DNJ-13 in the absence of additional factors, was performed using the Finite Element Whole Boundary Fitting and C(s) methods of the UltraScan software package [92], which fits the data set assuming one species of particles and determines the sedimentation coefficient s<sub>20,w</sub> and the Diffusion coefficient D<sub>20,w</sub>. These values are then used to obtain the molecular weight of the sedimenting particle. The molecular weight, s<sub>20,w</sub> and D<sub>20,w</sub> of \*DNJ-13 and \*BAG-1 corresponded to the values obtained for the unlabeled proteins.

### Luciferase refolding assay

Recombinant luciferase (10  $\mu$ M) was denatured for 45 min at room temperature in denaturing buffer (25 mM HEPES/NaOH, pH 7.5, 50 mM KCl, 15 mM MgCl<sub>2</sub>, 1 mM ATP, 10 mM DTE, 0.05 mg/mL BSA, 5 M GdmCl). For refolding, denatured luciferase was diluted 1:125 in luminescence buffer (25 mM HEPES/NaOH, pH 7.5, 50 mM KCl, 15 mM MgCl<sub>2</sub>, 1 mM ATP, 2 mM DTE, 0.05 mg/mL BSA, 240  $\mu$ M CoA, 0.1 mM luciferin, 10 mM PEP, 50  $\mu$ g/mL pyruvate kinase) containing 3.2  $\mu$ M CeHsc70, 0.8  $\mu$ M DNJ-13 and 0.4  $\mu$ M BAG-1. Reactions were carried out in white 96-well LIA-plates (Greiner Bio-One, Solingen, Germany). Luciferase activity was detected continuously over a time period of 2 h at 25°C by using a Tecan GENios<sup>TM</sup> microplate reader (Tecan Trading Ltd., Männedorf, Switzerland).

### Limited proteolysis

The CeHsc70 fragments  $\Delta$ 512,  $\Delta$ 545 and the full-length protein were digested by chymotrypsin at 25°C. The reaction was carried out in 40 mM HEPES/KOH, pH 7.5, 20 mM KCl, 10 mM CaCl<sub>2</sub> with a final concentration of 20  $\mu$ g/ml  $\alpha$ -chymotrypsin (Sigma-Aldrich, St. Louis, MO, USA) and 600  $\mu$ g/ml of the corresponding proteins. By adding PMSF, dissolved in DMSO to a final concentration of 33 mM at the indicated time points, the digestion was stopped. The samples were immediately boiled in 1  $\times$  loading buffer, resolved electrophoretically on 12% polyacryl-

amide gels and stained with coomassie blue according to standard protocols.

### Statistical validation

*In vivo* experiments were replicated three times. The results at each temperature were averaged among these replicates and the standard deviation was calculated. Both values are presented in the respective figures. CD unfolding transitions, single-turnover ATPase, AUC and luciferase refolding assays were performed in three separate experiments and representative data are shown. In cases, where kinetic parameters were derived from these assays, the values obtained from fitting the three independent kinetics were averaged and are given together with their respective standard deviation. Steady-state ATPase measurements were also performed in triplicates and the obtained  $k_{cat}$  and apparent  $K_D$  values and their standard deviation were obtained by averaging.

### Supporting Information

**Figure S1 Thermal stability of CeHsc70 versus HsHsc70.** DSF melting curves indicate that Hsc70 from *C. elegans* (□) is about 10°C less stable than the human ortholog (○). Adding ADP stabilized CeHsc70 (■) as well as human Hsc70 (•) to a similar extent. Error bars reflect the standard deviation of three experiments. (TIF)

**Figure S2 The influence of a His<sub>6</sub> tag on ATPase activity.** His<sub>6</sub>-CeHsc70 as used throughout the study and as described in the Materials and Methods section was compared to a His<sub>6</sub> free protein batch, generated from the same stock. The removal of the tag increases the average activity within the margin of error (standard deviation of three measurements). (TIF)

**Figure S3 Comparative stability of CeHsc70 truncations.** (A) CD thermal transitions indicate that all variants of CeHsc70 -

although about 10°C less stable than the human protein (grey) are comparably stable (CeHsc70, yellow; CeHsc70-Δ545, light blue; CeHsc70-Δ512, red; CeHsc70-Δ384, green). Compare Table 1 for transition midpoints. (B) A similar stability for all fragments is also highlighted by limited proteolysis. CeHsc70, CeHsc70-Δ545, and CeHsc70-Δ512 were subjected to α-chymotrypsin digestion and subsequent denaturing gel electrophoresis after quenching the reaction at the indicated timepoints. The kinetics are similar for all proteins, which all degrade to a species indicated by the asterisk. This implies that the overall structure of the core domain is preserved. (C) DSF further confirms a comparable overall CeHsc70 (□), CeHsc70-Δ545 (Δ), and CeHsc70-Δ512 (○) the fragments and the wild type proteins are stabilized in a highly similar manner by the addition of ADP (■, ▲, •, respectively; see Table 2 for transition midpoints). (D) CeHsc70-Δ545 (□) exhibits a slightly different transition curve. Yet, the transition midpoint at about 37°C is comparable to the other fragments. The stabilization of the structure by roughly 10°C through the addition of ADP (■) is also observed. (TIF)

### Acknowledgments

We thank Borries Demeler (The University of Texas Health Science Center, San Antonio, Texas, USA) for providing a license to his software package UltraScan 9.8, and Richard I. Morimoto (Northwestern University, Evanston, IL, USA) for providing the heat-shock reporter strain. Finally, we thank Eva Absmeier and Moritz Marcinowski for critically reading the manuscript.

### Author Contributions

Conceived and designed the experiments: KR. Performed the experiments: LS FTE AMG KR CJOK KP. Analyzed the data: LS FTE KR CJOK KP. Wrote the paper: KR CJOK.

### References

- Palleros DR, Welch WJ, Fink AL (1991) Interaction of hsp70 with unfolded proteins: effects of temperature and nucleotides on the kinetics of binding. *Proc Natl Acad Sci U S A* 88: 5719–5723.
- Wiech H, Buchner J, Zimmermann M, Zimmermann R, Jakob U (1993) Hsc70, immunoglobulin heavy chain binding protein, and Hsp90 differ in their ability to stimulate transport of precursor proteins into mammalian microsomes. *J Biol Chem* 268: 7414–7421.
- Young JC, Agashe VR, Siegers K, Hartl FU (2004) Pathways of chaperone-mediated protein folding in the cytosol. *Nat Rev Mol Cell Biol* 5: 781–791.
- Mayer MP, Bukau B (2005) Hsp70 chaperones: cellular functions and molecular mechanism. *Cell Mol Life Sci* 62: 670–684.
- Bocking T, Aguet F, Harrison SC, Kirchhausen T (2011) Single-molecule analysis of a molecular disassemblase reveals the mechanism of Hsc70-driven clathrin uncoating. *Nat Struct Mol Biol* 18: 295–301.
- Feige MJ, Hendershot LM, Buchner J (2010) How antibodies fold. *Trends Biochem Sci* 35: 189–198.
- Craig EA, Kramer J, Shilling J, Werner-Washburne M, Holmes S, et al. (1989) SSC1, an essential member of the yeast HSP70 multigene family, encodes a mitochondrial protein. *Mol Cell Biol* 9: 3000–3008.
- Su PH, Li HM (2010) Stromal Hsp70 is important for protein translocation into pea and Arabidopsis chloroplasts. *Plant Cell* 22: 1516–1531.
- Craig EA, Jacobsen K (1984) Mutations of the heat inducible 70 kilodalton genes of yeast confer temperature sensitive growth. *Cell* 38: 841–849.
- Hageman J, Kampinga HH (2009) Computational analysis of the human HSPH/HSPA/DNAJ family and cloning of a human HSPH/HSPA/DNAJ expression library. *Cell Stress Chaperones* 14: 1–21.
- Guhathakurta D, Palomar L, Stormo GD, Tedesco P, Johnson TE, et al. (2002) Identification of a novel cis-regulatory element involved in the heat shock response in *Caenorhabditis elegans* using microarray gene expression and computational methods. *Genome Res* 12: 701–712.
- Gaiser AM, Kaiser CJ, Haslbeck V, Richter K (2011) Downregulation of the hsp90 system causes defects in muscle cells of *caenorhabditis elegans*. *PLoS One* 6: e25485.
- Nollen EA, Garcia SM, van HG, Kim S, Chavez A, et al. (2004) Genome-wide RNA interference screen identifies previously undescribed regulators of polyglutamine aggregation. *Proc Natl Acad Sci U S A* 101: 6403–6408.
- Gaiser AM, Brandt F, Richter K (2009) The Non-canonical Hop Protein from *Caenorhabditis elegans* Exerts Essential Functions and Forms Binary Complexes with Either Hsc70 or Hsp90. *J Mol Biol*.
- Kamath RS, Fraser AG, Dong Y, Poulin J, Durbin R, et al. (2003) Systematic functional analysis of the *Caenorhabditis elegans* genome using RNAi. *Nature* 421: 231–237.
- Popp S, Packschies L, Radzwill N, Vogel KP, Steinhoff HJ, et al. (2005) Structural dynamics of the DnaK-peptide complex. *J Mol Biol* 347: 1039–1052.
- Morshauer RC, Wang H, Flynn GC, Zuderweg ER (1995) The peptide-binding domain of the chaperone protein Hsc70 has an unusual secondary structure topology. *Biochemistry* 34: 6261–6266.
- Swain JF, Dinler G, Sivendran R, Montgomery DL, Stotz M, et al. (2007) Hsp70 chaperone ligands control domain association via an allosteric mechanism mediated by the interdomain linker. *Mol Cell* 26: 27–39.
- Rist W, Graf C, Bukau B, Mayer MP (2006) Amide hydrogen exchange reveals conformational changes in hsp70 chaperones important for allosteric regulation. *J Biol Chem* 281: 16493–16501.
- Schlecht R, Erbse AH, Bukau B, Mayer MP (2011) Mechanics of Hsp70 chaperones enables differential interaction with client proteins. *Nat Struct Mol Biol* 18: 345–351.
- Zhu X, Zhao X, Burkholder WF, Gragerov A, Ogata CM, et al. (1996) Structural analysis of substrate binding by the molecular chaperone DnaK. *Science* 272: 1606–1614.
- Freeman BC, Myers MP, Schumacher R, Morimoto RI (1995) Identification of a regulatory motif in Hsp70 that affects ATPase activity, substrate binding and interaction with HDJ-1. *EMBO J* 14: 2281–2292.
- Young JC (2010) Mechanisms of the Hsp70 chaperone system. *Biochem Cell Biol* 88: 291–300.
- Kampinga HH, Craig EA (2010) The HSP70 chaperone machinery: J proteins as drivers of functional specificity. *Nat Rev Mol Cell Biol* 11: 579–592.

25. Russell R, Wali KA, Mehl AF, McMacken R (1999) DnaJ dramatically stimulates ATP hydrolysis by DnaK: insight into targeting of Hsp70 proteins to polypeptide substrates. *Biochemistry* 38: 4165–4176.
26. Harrison CJ, Hayer-Hartl M, Di LM, Hartl F, Kuriyan J (1997) Crystal structure of the nucleotide exchange factor GrpE bound to the ATPase domain of the molecular chaperone DnaK. *Science* 276: 431–435.
27. Packschies L, Theyssen H, Buchberger A, Bukau B, Goody RS, et al. (1997) GrpE accelerates nucleotide exchange of the molecular chaperone DnaK with an associative displacement mechanism. *Biochemistry* 36: 3417–3422.
28. Liberek K, Marszałek J, Ang D, Georgopoulos C, Zylicz M (1991) *Escherichia coli* DnaJ and GrpE heat shock proteins jointly stimulate ATPase activity of DnaK. *Proc Natl Acad Sci U S A* 88: 2874–2878.
29. Hohfeld J, Jentsch S (1997) GrpE-like regulation of the hsc70 chaperone by the anti-apoptotic protein BAG-1. *EMBO J* 16: 6209–6216.
30. Szabo A, Langer T, Schroder H, Flanagan J, Bukau B, et al. (1994) The ATP hydrolysis-dependent reaction cycle of the *Escherichia coli* Hsp70 system DnaK, DnaJ, and GrpE. *Proc Natl Acad Sci U S A* 91: 10345–10349.
31. Jordan R, McMacken R (1995) Modulation of the ATPase activity of the molecular chaperone DnaK by peptides and the DnaJ and GrpE heat shock proteins. *J Biol Chem* 270: 4563–4569.
32. Pierpaoli EV, Sandmeier E, Baici A, Schonfeld HJ, Gisler S, et al. (1997) The power stroke of the DnaK/DnaJ/GrpE molecular chaperone system. *J Mol Biol* 269: 757–768.
33. Schroder H, Langer T, Hartl FU, Bukau B (1993) DnaK, DnaJ and GrpE form a cellular chaperone machinery capable of repairing heat-induced protein damage. *EMBO J* 12: 4137–4144.
34. Brehmer D, Rudiger S, Gassler CS, Klostermeier D, Packschies L, et al. (2001) Tuning of chaperone activity of Hsp70 proteins by modulation of nucleotide exchange. *Nat Struct Biol* 8: 427–432.
35. Takayama S, Bimston DN, Matsuzawa S, Freeman BC, Aime-Sempe C, et al. (1997) BAG-1 modulates the chaperone activity of Hsp70/Hsc70. *EMBO J* 16: 4887–4896.
36. Bimston D, Song J, Winchester D, Takayama S, Reed JC, et al. (1998) BAG-1, a negative regulator of Hsp70 chaperone activity, uncouples nucleotide hydrolysis from substrate release. *EMBO J* 17: 6871–6878.
37. Tzankov S, Wong MJ, Shi K, Nassif C, Young JC (2008) Functional divergence between co-chaperones of Hsc70. *J Biol Chem* 283: 27100–27109.
38. Gassler CS, Wiederkehr T, Brehmer D, Bukau B, Mayer MP (2001) Bag-1M accelerates nucleotide release for human Hsc70 and Hsp70 and can act concentration-dependent as positive and negative cofactor. *J Biol Chem* 276: 32538–32544.
39. Heschl MF, Baillie DL (1990) The HSP70 multigene family of *Caenorhabditis elegans*. *Comp Biochem Physiol B* 96: 633–637.
40. Worrall LJ, Walkinshaw MD (2007) Crystal structure of the C-terminal three-helix bundle subdomain of *C. elegans* Hsp70. *Biochem Biophys Res Commun* 357: 105–110.
41. Symersky J, Zhang Y, Schormann N, Li S, Bunzel R, et al. (2004) Structural genomics of *Caenorhabditis elegans*: structure of the BAG domain. *Acta Crystallogr D Biol Crystallogr* 60: 1606–1610.
42. Release WS 227, WormBase web site. Available: <http://www.wormbase.org>. Accessed 2011 Oct 1.
43. Lopez-Buesa P, Pfund C, Craig EA (1998) The biochemical properties of the ATPase activity of a 70-kDa heat shock protein (Hsp70) are governed by the C-terminal domains. *Proc Natl Acad Sci U S A* 95: 15253–15258.
44. Wegele H, Haslbeck M, Reinstein J, Buchner J (2003) Stil is a novel activator of the Ssa proteins. *J Biol Chem* 278: 25970–25976.
45. Vogel M, Mayer MP, Bukau B (2006) Allosteric regulation of Hsp70 chaperones involves a conserved interdomain linker. *J Biol Chem* 281: 38705–38711.
46. Jiang J, Prasad K, Lafer EM, Sousa R (2005) Structural basis of interdomain communication in the Hsc70 chaperone. *Mol Cell* 20: 513–524.
47. Aponte RA, Zimmermann S, Reinstein J (2010) Directed evolution of the DnaK chaperone: mutations in the lid domain result in enhanced chaperone activity. *J Mol Biol* 399: 154–167.
48. Sondermann H, Scheufler C, Schneider C, Hohfeld J, Hartl FU, et al. (2001) Structure of a Bag/Hsc70 complex: convergent functional evolution of Hsp70 nucleotide exchange factors. *Science* 291: 1553–1557.
49. Stuart JK, Myska DG, Joss L, Mitchell RS, McDonald SM, et al. (1998) Characterization of interactions between the anti-apoptotic protein BAG-1 and Hsc70 molecular chaperones. *J Biol Chem* 273: 22506–22514.
50. Welch WJ, Feramisco JR (1982) Purification of the major mammalian heat shock proteins. *J Biol Chem* 257: 14949–14959.
51. Sha B, Lee S, Cyr DM (2000) The crystal structure of the peptide-binding fragment from the yeast Hsp40 protein Sis1. *Structure* 8: 799–807.
52. Shi YY, Hong XG, Wang CC (2005) The C-terminal (331–376) sequence of *Escherichia coli* DnaJ is essential for dimerization and chaperone activity: a small angle X-ray scattering study in solution. *J Biol Chem* 280: 22761–22768.
53. Sondermann H, Ho AK, Listenberger LL, Siegers K, Moarefi I, et al. (2002) Prediction of novel Bag-1 homologs based on structure/function analysis identifies Snl1p as an Hsp70 co-chaperone in *Saccharomyces cerevisiae*. *J Biol Chem* 277: 33220–33227.
54. Terada K, Mori M (2000) Human DnaJ homologs dj2 and dj3, and bag-1 are positive cochaperones of hsc70. *J Biol Chem* 275: 24728–24734.
55. Nollen EA, Kabakov AE, Brunsting JF, Kanon B, Hohfeld J, et al. (2001) Modulation of in vivo HSP70 chaperone activity by Hip and Bag-1. *J Biol Chem* 276: 4677–4682.
56. Popp SL, Reinstein J (2009) Functional characterization of the DnaK chaperone system from the archaeon *Methanothermobacter thermoautotrophicus* DeltaH. *FEBS Lett* 583: 573–578.
57. Strub A, Zufall N, Voos W (2003) The putative helical lid of the Hsp70 peptide-binding domain is required for efficient preprotein translocation into mitochondria. *J Mol Biol* 334: 1087–1099.
58. Fernandez-Saiz V, Moro F, Arizmendi JM, Acebron SP, Muga A (2006) Ionic contacts at DnaK substrate binding domain involved in the allosteric regulation of lid dynamics. *J Biol Chem* 281: 7479–7488.
59. Mayer MP, Schroder H, Rudiger S, Paal K, Laufen T, et al. (2000) Multistep mechanism of substrate binding determines chaperone activity of Hsp70. *Nat Struct Biol* 7: 586–593.
60. Morshauer RC, Hu W, Wang H, Pang Y, Flynn GC, et al. (1999) High-resolution solution structure of the 18 kDa substrate-binding domain of the mammalian chaperone protein Hsc70. *J Mol Biol* 289: 1387–1403.
61. Wang H, Kurochkin AV, Pang Y, Hu W, Flynn GC, et al. (1998) NMR solution structure of the 21 kDa chaperone protein DnaK substrate binding domain: a preview of chaperone-protein interaction. *Biochemistry* 37: 7929–7940.
62. Knarr G, Kies U, Bell S, Mayer M, Buchner J (2002) Interaction of the chaperone BIP with an antibody domain: implications for the chaperone cycle. *J Mol Biol* 318: 611–620.
63. Rodriguez F, Arsene-Ploutze F, Rist W, Rudiger S, Schneider-Mergener J, et al. (2008) Molecular basis for regulation of the heat shock transcription factor sigma32 by the DnaK and DnaJ chaperones. *Mol Cell* 32: 347–358.
64. Slepnev SV, Patchen B, Peterson KM, Witt SN (2003) Importance of the D and E helices of the molecular chaperone DnaK for ATP binding and substrate release. *Biochemistry* 42: 5867–5876.
65. Buczynski G, Slepnev SV, Sehorn MG, Witt SN (2001) Characterization of a lidless form of the molecular chaperone DnaK: deletion of the lid increases peptide on- and off-rate constants. *J Biol Chem* 276: 27231–27236.
66. Gassler CS, Buchberger A, Laufen T, Mayer MP, Schroder H, et al. (1998) Mutations in the DnaK chaperone affecting interaction with the DnaJ cochaperone. *Proc Natl Acad Sci U S A* 95: 15229–15234.
67. Suh WC, Lu CZ, Gross CA (1999) Structural features required for the interaction of the Hsp70 molecular chaperone DnaK with its cochaperone DnaJ. *J Biol Chem* 274: 30534–30539.
68. Laufen T, Mayer MP, Beisel C, Klostermeier D, Mogk A, et al. (1999) Mechanism of regulation of hsp70 chaperones by DnaJ cochaperones. *Proc Natl Acad Sci U S A* 96: 5452–5457.
69. Minami Y, Hohfeld J, Ohtsuka K, Hartl FU (1996) Regulation of the heat-shock protein 70 reaction cycle by the mammalian DnaJ homolog, Hsp40. *J Biol Chem* 271: 19617–19624.
70. Cajo GC, Horne BE, Kelley WL, Schwager F, Georgopoulos C, et al. (2006) The role of the DIF motif of the DnaJ (Hsp40) co-chaperone in the regulation of the DnaK (Hsp70) chaperone cycle. *J Biol Chem* 281: 12436–12444.
71. Han W, Christen P (2001) Mutations in the interdomain linker region of DnaK abolish the chaperone action of the DnaK/DnaJ/GrpE system. *FEBS Lett* 497: 55–58.
72. Wall D, Zylicz M, Georgopoulos C (1994) The NH2-terminal 108 amino acids of the *Escherichia coli* DnaJ protein stimulate the ATPase activity of DnaK and are sufficient for lambda replication. *J Biol Chem* 269: 5446–5451.
73. Suh WC, Burkholder WF, Lu CZ, Zhao X, Gottesman ME, et al. (1998) Interaction of the Hsp70 molecular chaperone, DnaK, with its cochaperone DnaJ. *Proc Natl Acad Sci U S A* 95: 15223–15228.
74. Wawrzynow A, Banecki B, Wall D, Liberek K, Georgopoulos C, et al. (1995) ATP hydrolysis is required for the DnaJ-dependent activation of DnaK chaperone for binding to both native and denatured protein substrates. *J Biol Chem* 270: 19307–19311.
75. Wawrzynow A, Zylicz M (1995) Divergent effects of ATP on the binding of the DnaK and DnaJ chaperones to each other, or to their various native and denatured protein substrates. *J Biol Chem* 270: 19300–19306.
76. McCarty JS, Buchberger A, Reinstein J, Bukau B (1995) The role of ATP in the functional cycle of the DnaK chaperone system. *J Mol Biol* 249: 126–137.
77. Greene MK, Maskos K, Landry SJ (1998) Role of the J-domain in the cooperation of Hsp40 with Hsp70. *Proc Natl Acad Sci U S A* 95: 6108–6113.
78. Mayer MP, Laufen T, Paal K, McCarty JS, Bukau B (1999) Investigation of the interaction between DnaK and DnaJ by surface plasmon resonance spectroscopy. *J Mol Biol* 289: 1131–1144.
79. Karzai AW, McMacken R (1996) A bipartite signaling mechanism involved in DnaJ-mediated activation of the *Escherichia coli* DnaK protein. *J Biol Chem* 271: 11236–11246.
80. Chesnokova LS, Slepnev SV, Protasevich II, Sehorn MG, Brouillette CG, et al. (2003) Deletion of DnaK's lid strengthens binding to the nucleotide exchange factor, GrpE: a kinetic and thermodynamic analysis. *Biochemistry* 42: 9028–9040.
81. Jiang J, Maes EG, Taylor AB, Wang L, Hinck AP, et al. (2007) Structural basis of J cochaperone binding and regulation of Hsp70. *Mol Cell* 28: 422–433.
82. Buchberger A, Theyssen H, Schroder H, McCarty JS, Virgallita G, et al. (1995) Nucleotide-induced conformational changes in the ATPase and substrate binding domains of the DnaK chaperone provide evidence for interdomain communication. *J Biol Chem* 270: 16903–16910.

83. Marciniowski M, Holler M, Feige MJ, Baerend D, Lamb DC, et al. (2011) Substrate discrimination of the chaperone BiP by autonomous and cochaperone-regulated conformational transitions. *Nat Struct Mol Biol* 18: 150–158.
84. Wittung-Stafshede P, Guidry J, Horne BE, Landry SJ (2003) The J-domain of Hsp40 couples ATP hydrolysis to substrate capture in Hsp70. *Biochemistry* 42: 4937–4944.
85. Bendz H, Ruhland SC, Pandya MJ, Hainzl O, Riegelsberger S, et al. (2007) Human heat shock protein 70 enhances tumor antigen presentation through complex formation and intracellular antigen delivery without innate immune signaling. *J Biol Chem* 282: 31688–31702.
86. Niesen FH, Berglund H, Vedadi M (2007) The use of differential scanning fluorimetry to detect ligand interactions that promote protein stability. *Nat Protoc* 2: 2212–2221.
87. Ali JA, Jackson AP, Howells AJ, Maxwell A (1993) The 43-kilodalton N-terminal fragment of the DNA gyrase B protein hydrolyzes ATP and binds coumarin drugs. *Biochemistry* 32: 2717–2724.
88. Weikl T, Muschler P, Richter K, Veit T, Reinstein J, et al. (2000) C-terminal regions of Hsp90 are important for trapping the nucleotide during the ATPase cycle. *J Mol Biol* 303: 583–592.
89. Stafford WF III (1992) Boundary analysis in sedimentation transport experiments: a procedure for obtaining sedimentation coefficient distributions using the time derivative of the concentration profile. *Anal Biochem* 203: 295–301.
90. Gaiser AM, Kretzschmar A, Richter K (2010) Cdc37-Hsp90 complexes are responsive to nucleotide-induced conformational changes and binding of further cofactors. *J Biol Chem* 285: 40921–40932.
91. Hayes DB, Stafford WF (2010) SEDVIEW, real-time sedimentation analysis. *Macromol Biosci* 10: 731–735.
92. Demeler B, Brookes E, Wang R, Schirf V, Kim CA (2010) Characterization of reversible associations by sedimentation velocity with UltraScan. *Macromol Biosci* 10: 775–782.
93. Bertelsen EB, Chang L, Gestwicki JE, Zuiderweg ER (2009) Solution conformation of wild-type *E. coli* Hsp70 (DnaK) chaperone complexed with ADP and substrate. *Proc Natl Acad Sci U S A* 106: 8471–8476.
